# Supplementary material for: Self-Perceptions of Readiness to Use Electronic Health Records Among Medical Students: Survey Study
Source: PubMed Central journal article supplement (PMC7320310; doi:10.2196/17585), 2020-06-12
Supplement: mededu_v6i1e17585_app1.pdf [file mededu_v6i1e17585_app1.pdf]

## Default Question Block

Which program are you enrolled in?

- Pharmacy
- Medicine

Which program year are you currently enrolled in? (as of January 2019)

- 1st year
- 2nd year
- 3rd year
- 4th year

Gender

- Male
- Female

Age

- <25
- 25-27
- 28-30
- >30

How much experience do you have with the following electronic health records (outside of the school's curriculum)?

|                    | No experience         | <1 month              | 1-3 months            | 4-6 months            | >6 months             |
|--------------------|-----------------------|-----------------------|-----------------------|-----------------------|-----------------------|
| Community Pharmacy | <input type="radio"/> | <input type="radio"/> | <input type="radio"/> | <input type="radio"/> | <input type="radio"/> |
| Ambulatory Clinic  | <input type="radio"/> | <input type="radio"/> | <input type="radio"/> | <input type="radio"/> | <input type="radio"/> |
| UCSD Free Clinic   | <input type="radio"/> | <input type="radio"/> | <input type="radio"/> | <input type="radio"/> | <input type="radio"/> |
| Inpatient Setting  | <input type="radio"/> | <input type="radio"/> | <input type="radio"/> | <input type="radio"/> | <input type="radio"/> |

Rate how comfortable you feel doing the following on a scale from 1 to 5, with 1 being very uncomfortable and 5 being very comfortable.

|                                                                              | 1 (Very Uncomfortable) | 2                     | 3                     | 4                     | 5 (Very Comfortable)  |
|------------------------------------------------------------------------------|------------------------|-----------------------|-----------------------|-----------------------|-----------------------|
| Finding laboratory results                                                   | <input type="radio"/>  | <input type="radio"/> | <input type="radio"/> | <input type="radio"/> | <input type="radio"/> |
| Finding progress notes                                                       | <input type="radio"/>  | <input type="radio"/> | <input type="radio"/> | <input type="radio"/> | <input type="radio"/> |
| Identifying clinical documentation errors in the electronic health record    | <input type="radio"/>  | <input type="radio"/> | <input type="radio"/> | <input type="radio"/> | <input type="radio"/> |
| Entering a new diagnosis                                                     | <input type="radio"/>  | <input type="radio"/> | <input type="radio"/> | <input type="radio"/> | <input type="radio"/> |
| Reviewing medication administration history and future scheduled medications | <input type="radio"/>  | <input type="radio"/> | <input type="radio"/> | <input type="radio"/> | <input type="radio"/> |
| Performing medication reconciliation in the electronic health record         | <input type="radio"/>  | <input type="radio"/> | <input type="radio"/> | <input type="radio"/> | <input type="radio"/> |
|                                                                              | 1 (Very Uncomfortable) | 2                     | 3                     | 4                     | 5 (Very Comfortable)  |
| Updating a patient's problem list to include a new problem                   | <input type="radio"/>  | <input type="radio"/> | <input type="radio"/> | <input type="radio"/> | <input type="radio"/> |

Documenting

Documenting immunizations in the electronic health record

Documenting allergies in the electronic health record

Documenting a past medical history and a social history (smoking, dietary, illicit drugs, etc.) in the electronic health record

Documenting a clinical encounter using templates or SOAP notes in the electronic health record

Documenting notes, including: history and physical on admission, progress notes, discharge summaries

1 (Very Uncomfortable)

2

3

4

5 (Very Comfortable)

Entering medication orders in the electronic health record

Verifying medication orders in the electronic health record

Messaging other providers within the electronic health record

Overall, I feel prepared to use the electronic health record

Comment on your EHR training/preparedness to work in EHR:

Powered by Qualtrics
